# Supplementary material for: Preparation and characterization of tripeptide chiral stationary phases with varying amino acid sequences and terminal groups
Source: Royal Society of Chemistry journal article supplement (doi:10.1039/c5ay00691k), 2015-01-01
Supplement: c5ay00691k1.pdf [file c5ay00691k1.pdf]

# Preparation and characterization of tripeptide chiral stationary phases with varying amino acid sequences and terminal groups

Yang Li <sup>a,b</sup>, Denggao Jiang <sup>\*a</sup>, Deyou Huang <sup>a</sup>, Mingxian Huang <sup>c</sup>,  
Lianjie Li <sup>a</sup>

<sup>a</sup> School of Chemical Engineering and Energy, Zhengzhou University, 100 Kexue Road, Zhengzhou 450001, China

<sup>b</sup> Henan Institute for Food and Drug Control, 8 Jinger Road, Zhengzhou 450003, China

<sup>c</sup> Zhengzhou Innosep Biosciences, 11 Changchun Road, Zhengzhou, 450001, China

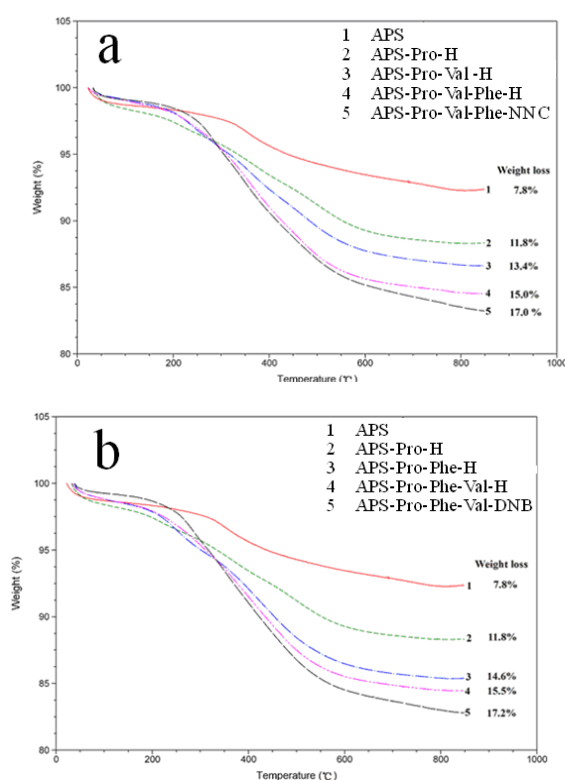

**Fig.S1.** Thermogravimetric analysis curves:  
(a) APS, APS-Pro-H, APS-Pro-Val-H, APS-Pro-Val-Phe-H, CSP1. (b) APS, APS-Pro-H, APS-Pro-Phe-H, APS-Pro-Phe-Val-H, CSP2.

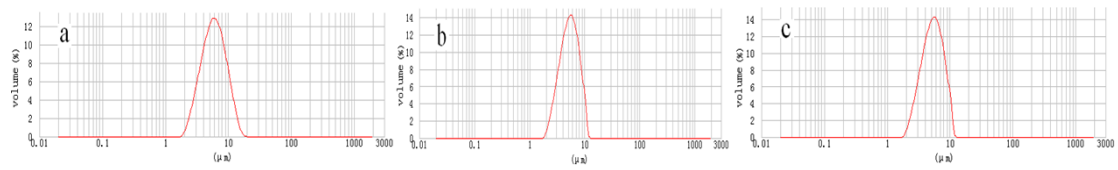

**Fig.S2.** Size distributions of the silica gel, CSP1 and CSP2:  
(a) silica gel; (b) CSP1; (c)CSP2.
